# Supplementary material for: Inhibition of Lipid Accumulation and Oxidation in Hepatocytes by Bioactive Bean Extracts
Source: MDPI journal article supplement (doi:10.3390/antiox13050513), 2024-04-25
Supplement: s1 [file s1]

# **Inhibition of Lipid Accumulation and Oxidation in Hepatocytes by Bioactive Bean Extracts**

**Dya Fita Dibwe,<sup>1</sup> Emi Kitayama,<sup>2</sup> Saki Oba,<sup>2</sup> Nire Takeishi,<sup>2</sup> Hitoshi Chiba,<sup>3</sup> Shu-Ping Hui<sup>\*,1</sup>**

<sup>1</sup> Faculty of Health Sciences, Hokkaido University, Kita-12, Nishi-5, Kita-Ku, Sapporo 060-0812, Japan;

<sup>2</sup> Graduate School of Health Sciences, Hokkaido University, Kita-12, Nishi-5, Kita-Ku, Sapporo 060-0812, Japan;

<sup>3</sup> Department of Nutrition, Sapporo University of Health Sciences, Nakanuma Nishi-4-3-1-15, Higashi-Ku, Sapporo 007-0894, Japan;

\* Correspondences: keino@hs.hokudai.ac.jp; Tel./Fax: +81-11-706-3693

## Supporting Information

### Table of contents:

|                                                                                                       |     |
|-------------------------------------------------------------------------------------------------------|-----|
| <b>Materials and Methods</b>                                                                          | P4  |
| 1. Chemicals and instruments                                                                          | P4  |
| 2. Liquid chromatography/mass spectrometry profiling of vanilla bean extract                          | P5  |
| 3. Lipid droplet accumulation inhibition assay                                                        | P5  |
| 4. <i>Metabolite identification via DFF and, <sup>1</sup>H-NMR analyses of selected bean extracts</i> | P6  |
| <b>Table S1:</b> List of selected beans used in this study                                            | P7  |
| <b>Figure S1.</b> Cytotoxicity of selected bean samples in HepG2 cell lines                           | P7  |
| <b>Table S2.</b> Accumulation of TAG species induced by OA                                            | P8  |
| <b>Table S3.</b> Accumulation of TGOOH species induced by OA                                          | P10 |
| <b>Table S4.</b> Accumulation of TAG species induced by LA                                            | P11 |
| <b>Table S5.</b> Accumulation of TGOOH species induced by LA                                          | P14 |

|                                                                                                                                                                                                                                       |     |
|---------------------------------------------------------------------------------------------------------------------------------------------------------------------------------------------------------------------------------------|-----|
| <b>Figure S2.</b> $^1\text{H}$ NMR spectrum of BE2 in DMSO- $d_6$                                                                                                                                                                     | P15 |
| <b>Figure S3.</b> $^1\text{H}$ NMR spectrum of BE4 in DMSO- $d_6$                                                                                                                                                                     | P16 |
| <b>Figure S4.</b> $^1\text{H}$ NMR spectrum of BE5 in DMSO- $d_6$                                                                                                                                                                     | P17 |
| <b>Figure S5.</b> $^1\text{H}$ NMR spectrum of BE8 in DMSO- $d_6$                                                                                                                                                                     | P18 |
| <b>Figure S6.</b> $^1\text{H}$ NMR spectra of bioactive extract BEs (BE2 and BE8) in DMSO- $d_6$                                                                                                                                      | P19 |
| <b>Figure S7.</b> $^1\text{H}$ NMR spectra of bioactive extract BEs (BE2, BE4, BE5 and BE8) in DMSO- $d_6$                                                                                                                            | P20 |
| <b>Figure S8.</b> A schema of the general data processing workflow of LC-MS data                                                                                                                                                      | P21 |
| <b>Figure S9.</b> LC-MS profiling of bioactive bean extracts. (A) Diagnostic Fragmentation Filtering (DFF) plot for metabolites analysis.<br>(B) 3D visualization of MS data                                                          | P22 |
| <b>Figure S10.</b> Identification of vanillin in BE8. (A) Three-dimensional (3D) liquid chromatography/mass spectrometry (LC-MS) of BE8 and vanillin. (B) Plot of the vanillin in BE8 using diagnostic fragmentation filtering (DFF). | P23 |
| <b>Figure S11:</b> HPLC profile of selected bean samples BE2 and BE8 at 200nm                                                                                                                                                         | P24 |

## Materials and Methods

### 1. *Chemicals and instruments*

General Experimental Procedures: Nuclear magnetic resonance (NMR) spectra were recorded using a JEOL ECX400 Delta spectrometer with TMS as an internal standard; chemical shifts were expressed as  $\delta$  values. An LTQ Orbitrap XL mass spectrometer (Thermo Fisher Scientific Inc., San Jose, CA, USA) was used for high-resolution electrospray ionization mass spectrometry (HR-ESI-MS) measurements. Methanol was purchased from Wako. High-glucose Dulbecco's Modified Eagle Medium (DMEM), Dulbecco's phosphate-buffered saline (DPBS), trypsin EDTA, fetal bovine serum (FBS), and penicillin-streptomycin (100 U/mL) were purchased from Gibco (Life Technologies, Carlsbad, CA, USA). Other materials used for cell culture were purchased from Corning (NY, USA). NMR spectra were acquired using a 400 MHz JNM-ECX400P spectrometer (JOEL, Japan). The spectra were processed using JOEL software, and the chemical shift ( $\delta$ ) values were expressed in ppm. OA was purchased from Cayman Chemical (Ann Arbor, MI, USA), and absorbance was measured using ARVO-MX (Perkin Elmer, Waltham, MA, USA).

## *2. Liquid chromatography/mass spectrometry profiling of vanilla bean extract*

### *LC-MS instrument conditions*

Samples of methanol BEs were separated using an Atlantis T3 C18 column (2.1×150 mm, 3 µm, 155 Waters, Milford, MA, USA) at a flow rate of 200 µL/min. LC gradient elution was performed using a mobile phase of 10 mM ammonium acetate solution, isopropanol, and methanol. The measurements were carried out in positive mode; the voltage of the MS capillary was 4.04 kV, flow rate of the sheath gas (nitrogen) was 50 psi, and auxiliary gas (nitrogen) was 20 psi. The high-resolution MS data were obtained in a scan range of  $m/z = 150\text{--}1100$ . MS/MS spectra were obtained by data-dependent acquisition using collision-induced dissociation (CID) in ion-trap mode for low-resolution masses. The raw data were processed using Xcalibur 2.2 (Thermo Fisher Scientific Inc., San Jose, CA, USA).

## *3. Lipid droplet accumulation inhibition assay*

LDAI activity was determined using an Oil Red O assay with 24-well plates ( $n = 4$  per treatment) based on a First, the staining of LDs in cultured hepatocytes was performed according to the manufacturer's instructions. Next, HepG2 cells ( $1.5 \times 10^4$ /well) were supplemented with 10% FBS, cultured, seeded into 35 mm dishes, and treated with the tested samples after 24 h. Oil Red O, a fat-soluble dye, is widely used for staining neutral lipids in LDs. Next, quantification of LD inhibition was assessed for test BEs by comparing it to the untreated control group (+OA) and normalizing the LDA absorbance values (%). Staining was performed using LD staining assay.

#### 4. Metabolite identification via DFF and, <sup>1</sup>H-NMR analyses of selected bean extracts

Natural products are usually synthesized as mixtures of structurally similar compounds instead of as a single compound. Because of their shared structural characteristics, numerous compounds of the same class are subject to similar MS/MS fragmentation and exhibit several identical product ions and/or neutral losses. The objective of DFF is to accurately detect all compounds of a specific class in a complex extract by filtering out non-targeted LC-MS/MS datasets for MS/MS spectra that contain class-specific product ions and/or neutral losses. The LC/MS profiling of the methanolic extract was presented as a 3D LC/MS plot with retention time and MS values. The LC/MS measurement and analysis of the vanilla BE revealed phenolic acid derivative metabolites.

It was possible to identify the phenolic derivative metabolites as major chemical constituents of the extract compared to the in-house standards. DFF is a straightforward and rapid strategy for detecting entire classes of compounds in a mixture of natural food products. DFF is especially relevant for the dereplication and discovery of natural product compounds. DFF was used for screening metabolites from LC-MS/MS datasets of BE8. The complementary results are 3D images and their DFF. The identified vanillin was further detected in the 3D LC-MS comparison of BE8 and vanillin standard and by using the DFF approach, as shown in the graph with the characteristic ion products and precursors from the LC-MS/MS analysis. As shown in the 3D plot in Figure S10, vanillin was found in the extract based on the retention time and MS/MS spectra of the authentic standard.

**Statistical Analysis.** All statistical analyses were performed using GraphPad Prism V7.0/10.1.2 software, Multiple comparison tests were performed using one-way ANOVA with Tukey's multiple comparison test. The level of significance was set at 5%. All values are expressed as the mean  $\pm$  standard deviation (SD).

**Table S1.** List of selected beans used in this study

| No. | Japanese name     | Scientific name            | Family      | Collection         | abbr. | Code |
|-----|-------------------|----------------------------|-------------|--------------------|-------|------|
| 1   | Daizu             | <i>Glycine max</i>         | Fabaceae    | Sapporo, Hokkaido, | GM    | BE1  |
| 2   | Kuro daizu        | <i>Glycine max</i>         | Fabaceae    | Sapporo, Hokkaido  | GM    | BE2  |
| 3   | Azuki             | <i>Vigna angularis</i>     | Fabaceae    | Sapporo, Hokkaido  | VA    | BE3  |
| 4   | Taisyo kintoki    | <i>Phaseolus vulgaris</i>  | Fabaceae    | Sapporo, Hokkaido  | PV    | BE4  |
| 5   | Murasaki hanamame | <i>Phaseolus coccineus</i> | Fabaceae    | Sapporo, Hokkaido, | PC    | BE5  |
| 6   | Shiro hanamame    | <i>Phaseolus coccineus</i> | Fabaceae    | Sapporo, Hokkaido, | PC    | BE6  |
| 7   | Soramame          | <i>Vicia faba</i>          | Fabaceae    | Sapporo, Hokkaido, | VF    | BE7  |
| 8   | Vanilla bean      | <i>Vanilla planifolia</i>  | Orchidaceae | Sapporo, Hokkaido, | VP    | BE8  |

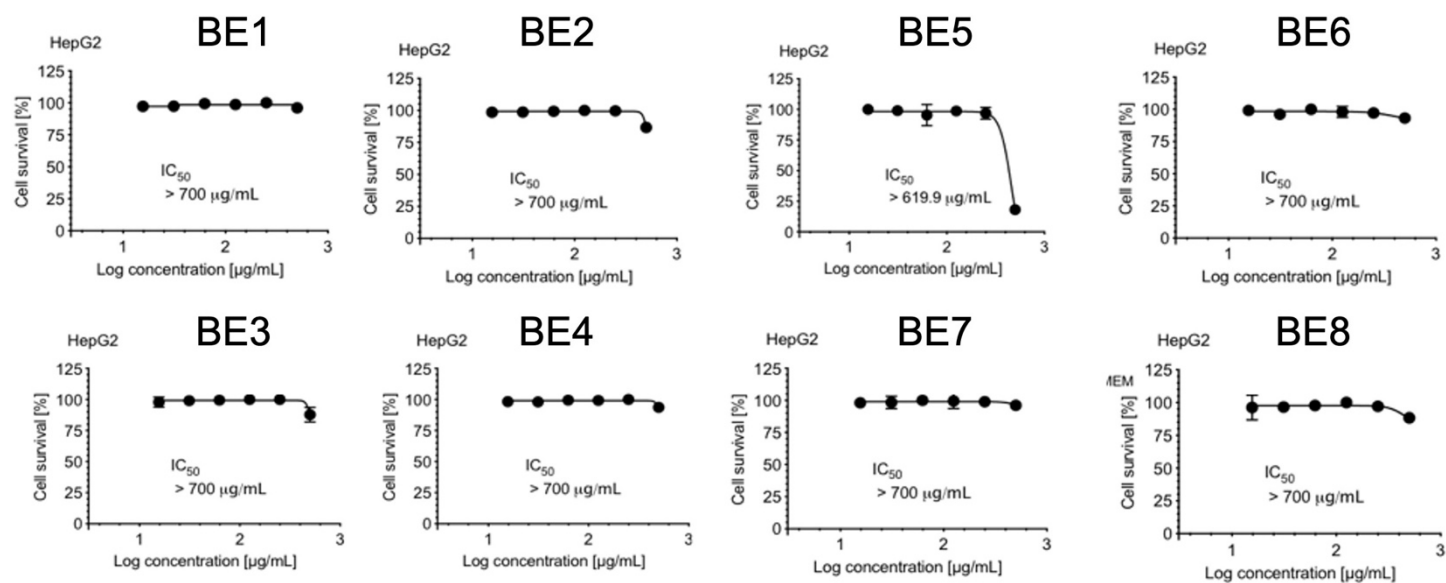

**Figure S1.** Cytotoxicity of selected bean samples in HepG2 cell lines

**Table S2.** Accumulation of TAG species induced by OA

| <b>Lipid species</b> | <b>RT</b> | <b>Ion</b>                        | <b>Calc. <i>m/z</i></b> | <b>Exptl. <i>m/z</i></b> | <b>ppm</b> |
|----------------------|-----------|-----------------------------------|-------------------------|--------------------------|------------|
| TAG 42:0             | 25.32     | [M+NH <sub>4</sub> ] <sup>+</sup> | 740.6763                | 740.6768                 | 0.68       |
| TAG 44:0             | 25.84     | [M+NH <sub>4</sub> ] <sup>+</sup> | 768.7076                | 768.7078                 | 0.26       |
| TAG 46:1             | 25.92     | [M+NH <sub>4</sub> ] <sup>+</sup> | 794.7232                | 794.7238                 | 0.75       |
| TAG 46:2             | 25.52     | [M+NH <sub>4</sub> ] <sup>+</sup> | 792.7076                | 792.7073                 | -0.38      |
| TAG 46:3             | 25.14     | [M+NH <sub>4</sub> ] <sup>+</sup> | 790.6919                | 790.6915                 | -0.51      |
| TAG 48:1             | 26.39     | [M+NH <sub>4</sub> ] <sup>+</sup> | 822.7545                | 822.7559                 | 1.70       |
| TAG 48:2             | 26.03     | [M+NH <sub>4</sub> ] <sup>+</sup> | 820.7389                | 820.7397                 | 0.97       |
| TAG 48:3             | 25.69     | [M+NH <sub>4</sub> ] <sup>+</sup> | 818.7232                | 818.7233                 | 0.12       |
| TAG 48:4             | 25.40     | [M+NH <sub>4</sub> ] <sup>+</sup> | 816.7076                | 816.7072                 | -0.49      |
| TAG 50:2             | 26.53     | [M+NH <sub>4</sub> ] <sup>+</sup> | 848.7702                | 848.7719                 | 2.00       |
| TAG 50:3             | 26.17     | [M+NH <sub>4</sub> ] <sup>+</sup> | 846.7545                | 846.7550                 | 0.59       |
| TAG 50:4             | 25.87     | [M+NH <sub>4</sub> ] <sup>+</sup> | 844.7389                | 844.7391                 | 0.24       |
| TAG 50:5             | 25.52     | [M+NH <sub>4</sub> ] <sup>+</sup> | 842.7232                | 842.7233                 | 0.12       |
| TAG 50:6             | 25.32     | [M+NH <sub>4</sub> ] <sup>+</sup> | 840.7076                | 840.7079                 | 0.36       |
| TAG 52:0             | 27.62     | [M+NH <sub>4</sub> ] <sup>+</sup> | 880.8328                | 880.8284                 | -5.00      |
| TAG 52:1             | 27.76     | [M+NH <sub>4</sub> ] <sup>+</sup> | 878.8171                | 878.8152                 | -2.16      |
| TAG 52:2             | 26.98     | [M+NH <sub>4</sub> ] <sup>+</sup> | 876.8015                | 876.8032                 | 1.94       |
| TAG 52:3             | 26.66     | [M+NH <sub>4</sub> ] <sup>+</sup> | 874.7858                | 874.7863                 | 0.57       |
| TAG 52:4             | 26.25     | [M+NH <sub>4</sub> ] <sup>+</sup> | 872.7702                | 872.7695                 | -0.80      |
| TAG 52:5             | 26.06     | [M+NH <sub>4</sub> ] <sup>+</sup> | 870.7545                | 870.7543                 | -0.23      |
| TAG 52:6             | 25.73     | [M+NH <sub>4</sub> ] <sup>+</sup> | 868.7389                | 868.7394                 | 0.58       |
| <b>Lipid species</b> | <b>RT</b> | <b>Ion</b>                        | <b>Calc. <i>m/z</i></b> | <b>Exptl. <i>m/z</i></b> | <b>ppm</b> |



---

|           |       |                                   |          |          |       |
|-----------|-------|-----------------------------------|----------|----------|-------|
| TAG 52:7  | 25.43 | [M+NH <sub>4</sub> ] <sup>+</sup> | 866.7232 | 866.7234 | 0.23  |
| TAG 52:8  | 25.05 | [M+NH <sub>4</sub> ] <sup>+</sup> | 864.7076 | 864.7079 | 0.35  |
| TAG 54:0  | 25.69 | [M+NH <sub>4</sub> ] <sup>+</sup> | 908.8641 | 908.8636 | -0.55 |
| TAG 54:1  | 28.42 | [M+NH <sub>4</sub> ] <sup>+</sup> | 906.8484 | 906.8461 | -2.54 |
| TAG 54:2  | 27.94 | [M+NH <sub>4</sub> ] <sup>+</sup> | 904.8328 | 904.8302 | -2.87 |
| TAG 54:3  | 27.47 | [M+NH <sub>4</sub> ] <sup>+</sup> | 902.8171 | 902.8184 | 1.44  |
| TAG 54:4  | 26.79 | [M+NH <sub>4</sub> ] <sup>+</sup> | 900.8015 | 900.8013 | -0.22 |
| TAG 54:5  | 26.42 | [M+NH <sub>4</sub> ] <sup>+</sup> | 898.7858 | 898.7861 | 0.33  |
| TAG 54:6  | 26.20 | [M+NH <sub>4</sub> ] <sup>+</sup> | 896.7702 | 896.7700 | -0.22 |
| TAG 54:7  | 25.92 | [M+NH <sub>4</sub> ] <sup>+</sup> | 894.7545 | 894.7550 | 0.56  |
| TAG 54:8  | 25.58 | [M+NH <sub>4</sub> ] <sup>+</sup> | 892.7389 | 892.7394 | 0.56  |
| TAG 54:9  | 25.32 | [M+NH <sub>4</sub> ] <sup>+</sup> | 890.7232 | 890.7236 | 0.45  |
| TAG 56:10 | 25.43 | [M+NH <sub>4</sub> ] <sup>+</sup> | 916.7389 | 916.7401 | 1.31  |
| TAG 56:4  | 27.62 | [M+NH <sub>4</sub> ] <sup>+</sup> | 928.8328 | 928.8319 | -0.97 |
| TAG 56:5  | 26.93 | [M+NH <sub>4</sub> ] <sup>+</sup> | 926.8171 | 926.8131 | -4.32 |
| TAG 56:6  | 26.77 | [M+NH <sub>4</sub> ] <sup>+</sup> | 924.8015 | 924.8011 | -0.43 |
| TAG 56:7  | 26.34 | [M+NH <sub>4</sub> ] <sup>+</sup> | 922.7858 | 922.7856 | -0.22 |
| TAG 56:8  | 26.06 | [M+NH <sub>4</sub> ] <sup>+</sup> | 920.7702 | 920.7701 | -0.11 |
| TAG 56:9  | 25.73 | [M+NH <sub>4</sub> ] <sup>+</sup> | 918.7545 | 918.7556 | 1.20  |
| TAG 58:10 | 25.92 | [M+NH <sub>4</sub> ] <sup>+</sup> | 944.7702 | 944.7706 | 0.42  |
| TAG 58:11 | 25.63 | [M+NH <sub>4</sub> ] <sup>+</sup> | 942.7545 | 942.7555 | 1.06  |
| TAG 58:12 | 25.48 | [M+NH <sub>4</sub> ] <sup>+</sup> | 940.7389 | 940.7436 | 5.00  |
| TAG 58:13 | 27.94 | [M+NH <sub>4</sub> ] <sup>+</sup> | 938.7232 | 938.7250 | 1.92  |
| TAG 58:6  | 27.53 | [M+NH <sub>4</sub> ] <sup>+</sup> | 952.8328 | 952.8324 | -0.42 |
| TAG 58:7  | 26.79 | [M+NH <sub>4</sub> ] <sup>+</sup> | 950.8171 | 950.8135 | -3.79 |
| TAG 58:8  | 26.56 | [M+NH <sub>4</sub> ] <sup>+</sup> | 948.8015 | 948.8010 | -0.53 |
| TAG 58:9  | 26.23 | [M+NH <sub>4</sub> ] <sup>+</sup> | 946.7858 | 946.7856 | -0.21 |

---

| <b>Lipid species</b> | <b>RT</b> | <b>Ion</b>                        | <b>Calc. <i>m/z</i></b> | <b>Exptl. <i>m/z</i></b> | <b>ppm</b> |
|----------------------|-----------|-----------------------------------|-------------------------|--------------------------|------------|
| TAG 60:10            | 26.31     | [M+NH <sub>4</sub> ] <sup>+</sup> | 972.8015                | 972.8010                 | -0.51      |
| TAG 60:11            | 26.09     | [M+NH <sub>4</sub> ] <sup>+</sup> | 970.7858                | 970.7859                 | 0.10       |
| TAG 60:12            | 25.84     | [M+NH <sub>4</sub> ] <sup>+</sup> | 968.7702                | 968.7706                 | 0.41       |
| TAG 60:13            | 25.43     | [M+NH <sub>4</sub> ] <sup>+</sup> | 966.7545                | 966.7545                 | 0.00       |
| TAG 62:12            | 26.23     | [M+NH <sub>4</sub> ] <sup>+</sup> | 996.8015                | 996.8016                 | 0.10       |
| TAG 62:13            | 25.95     | [M+NH <sub>4</sub> ] <sup>+</sup> | 994.7858                | 994.7866                 | 0.80       |
| TAG 62:14            | 25.66     | [M+NH <sub>4</sub> ] <sup>+</sup> | 992.7702                | 992.7708                 | 0.60       |
| TAG 64:16            | 25.52     | [M+NH <sub>4</sub> ] <sup>+</sup> | 1016.7702               | 1016.7735                | 3.25       |

**Table S3.** Accumulation of TGOOH species induced by OA

| <b>Lipid species</b> | <b>RT</b> | <b>Ion</b>                        | <b>Calc. <i>m/z</i></b> | <b>Exptl. <i>m/z</i></b> | <b>ppm</b> |
|----------------------|-----------|-----------------------------------|-------------------------|--------------------------|------------|
| TG-OOH 46:2          | 21.84     | [M+NH <sub>4</sub> ] <sup>+</sup> | 824.6974                | 824.6974                 | 0.00       |
| TG-OOH 48:1          | 26.98     | [M+NH <sub>4</sub> ] <sup>+</sup> | 854.7443                | 854.7430                 | -1.52      |
| TG-OOH 48:3          | 28.67     | [M+NH <sub>4</sub> ] <sup>+</sup> | 850.7130                | 850.7172                 | 4.94       |
| TG-OOH 48:5          | 26.14     | [M+NH <sub>4</sub> ] <sup>+</sup> | 846.6817                | 846.6844                 | 3.19       |
| TG-OOH 54:10         | 25.84     | [M+NH <sub>4</sub> ] <sup>+</sup> | 920.6974                | 920.6976                 | 0.22       |
| TG-OOH 60:13         | 20.56     | [M+NH <sub>4</sub> ] <sup>+</sup> | 998.7443                | 998.7397                 | -4.61      |
| TG-OOH 60:14         | 20.29     | [M+NH <sub>4</sub> ] <sup>+</sup> | 996.7287                | 996.7333                 | 4.62       |
| TG-OOH 60:15         | 19.62     | [M+NH <sub>4</sub> ] <sup>+</sup> | 994.7130                | 994.7175                 | 4.52       |

**Table S4.** Accumulation of TAG species induced by LA

| <b>Lipid species</b> | <b>RT</b> | <b>Ion</b>                        | <b>Calc. <i>m/z</i></b> | <b>Exptl. <i>m/z</i></b> | <b>ppm</b> |
|----------------------|-----------|-----------------------------------|-------------------------|--------------------------|------------|
| TAG 42:0             | 13.42     | [M+NH <sub>4</sub> ] <sup>+</sup> | 740.6763                | 740.6773                 | 1.35       |
| TAG 44:0             | 13.83     | [M+NH <sub>4</sub> ] <sup>+</sup> | 768.7076                | 768.7083                 | 0.91       |
| TAG 46:0             | 14.32     | [M+NH <sub>4</sub> ] <sup>+</sup> | 796.7389                | 796.7401                 | 1.51       |
| TAG 46:1             | 13.9      | [M+NH <sub>4</sub> ] <sup>+</sup> | 794.7232                | 794.7234                 | 0.25       |
| TAG 46:2             | 13.59     | [M+NH <sub>4</sub> ] <sup>+</sup> | 792.7076                | 792.7084                 | 1.01       |
| TAG 46:3             | 13.27     | [M+NH <sub>4</sub> ] <sup>+</sup> | 790.6919                | 790.6924                 | 0.63       |
| TAG 48:0             | 14.69     | [M+NH <sub>4</sub> ] <sup>+</sup> | 824.7702                | 824.7711                 | 1.09       |
| TAG 48:1             | 14.36     | [M+NH <sub>4</sub> ] <sup>+</sup> | 822.7545                | 822.7560                 | 1.82       |
| TAG 48:2             | 14.05     | [M+NH <sub>4</sub> ] <sup>+</sup> | 820.7389                | 820.7401                 | 1.46       |
| TAG 48:3             | 13.67     | [M+NH <sub>4</sub> ] <sup>+</sup> | 818.7232                | 818.7238                 | 0.73       |
| TAG 48:4             | 13.39     | [M+NH <sub>4</sub> ] <sup>+</sup> | 816.7076                | 816.7076                 | 0.00       |
| TAG 48:5             | 11.19     | [M+NH <sub>4</sub> ] <sup>+</sup> | 814.6169                | 814.6196                 | 3.31       |
| TAG 50:0             | 15.09     | [M+NH <sub>4</sub> ] <sup>+</sup> | 852.8015                | 852.8029                 | 1.64       |
| TAG 50:1             | 14.72     | [M+NH <sub>4</sub> ] <sup>+</sup> | 850.7858                | 850.7872                 | 1.65       |
| TAG 50:2             | 14.43     | [M+NH <sub>4</sub> ] <sup>+</sup> | 848.7702                | 848.7718                 | 1.89       |
| TAG 50:3             | 14.11     | [M+NH <sub>4</sub> ] <sup>+</sup> | 846.7545                | 846.7560                 | 1.77       |
| TAG 50:4             | 13.79     | [M+NH <sub>4</sub> ] <sup>+</sup> | 844.7389                | 844.7404                 | 1.78       |
| TAG 50:5             | 13.52     | [M+NH <sub>4</sub> ] <sup>+</sup> | 842.7232                | 842.7241                 | 1.07       |
| TAG 50:6             | 13.25     | [M+NH <sub>4</sub> ] <sup>+</sup> | 840.7076                | 840.7079                 | 0.36       |
| TAG 52:0             | 15.48     | [M+NH <sub>4</sub> ] <sup>+</sup> | 880.8328                | 880.8345                 | 1.93       |
| <b>Lipid species</b> | <b>RT</b> | <b>Ion</b>                        | <b>Calc. <i>m/z</i></b> | <b>Exptl. <i>m/z</i></b> | <b>ppm</b> |

| TAG 52:1      | 15.1  | [M+NH <sub>4</sub> ] <sup>+</sup> | 878.8171         | 878.8178          | 0.80  |
|---------------|-------|-----------------------------------|------------------|-------------------|-------|
| TAG 52:2      | 14.78 | [M+NH <sub>4</sub> ] <sup>+</sup> | 876.8015         | 876.8026          | 1.25  |
| TAG 52:3      | 14.5  | [M+NH <sub>4</sub> ] <sup>+</sup> | 874.7858         | 874.7870          | 1.37  |
| TAG 52:4      | 14.21 | [M+NH <sub>4</sub> ] <sup>+</sup> | 872.7702         | 872.7720          | 2.06  |
| TAG 52:5      | 13.87 | [M+NH <sub>4</sub> ] <sup>+</sup> | 870.7545         | 870.7556          | 1.26  |
| TAG 52:6      | 13.61 | [M+NH <sub>4</sub> ] <sup>+</sup> | 868.7389         | 868.7401          | 1.38  |
| TAG 52:7      | 13.42 | [M+NH <sub>4</sub> ] <sup>+</sup> | 866.7232         | 866.7239          | 0.81  |
| TAG 52:8      | 13.18 | [M+NH <sub>4</sub> ] <sup>+</sup> | 864.7076         | 864.7079          | 0.35  |
| TAG 54:0      | 15.89 | [M+NH <sub>4</sub> ] <sup>+</sup> | 908.8641         | 908.8655          | 1.54  |
| TAG 54:1      | 15.5  | [M+NH <sub>4</sub> ] <sup>+</sup> | 906.8484         | 906.8481          | -0.33 |
| TAG 54:10     | 13.08 | [M+NH <sub>4</sub> ] <sup>+</sup> | 888.7076         | 888.7095          | 2.14  |
| TAG 54:2      | 15.16 | [M+NH <sub>4</sub> ] <sup>+</sup> | 904.8328         | 904.8331          | 0.33  |
| TAG 54:3      | 14.89 | [M+NH <sub>4</sub> ] <sup>+</sup> | 902.8171         | 902.8172          | 0.11  |
| TAG 54:4      | 14.61 | [M+NH <sub>4</sub> ] <sup>+</sup> | 900.8015         | 900.8013          | -0.22 |
| TAG 54:5      | 14.3  | [M+NH <sub>4</sub> ] <sup>+</sup> | 898.7858         | 898.7859          | 0.11  |
| TAG 54:6      | 13.98 | [M+NH <sub>4</sub> ] <sup>+</sup> | 896.7702         | 896.7712          | 1.12  |
| TAG 54:7      | 13.72 | [M+NH <sub>4</sub> ] <sup>+</sup> | 894.7545         | 894.7554          | 1.01  |
| TAG 54:8      | 13.58 | [M+NH <sub>4</sub> ] <sup>+</sup> | 892.7389         | 892.7389          | 0.00  |
| TAG 54:9      | 13.33 | [M+NH <sub>4</sub> ] <sup>+</sup> | 890.7232         | 890.7243          | 1.23  |
| TAG 56:10     | 13.44 | [M+NH <sub>4</sub> ] <sup>+</sup> | 916.7389         | 916.7397          | 0.87  |
| TAG 56:11     | 13.27 | [M+NH <sub>4</sub> ] <sup>+</sup> | 914.7232         | 914.7255          | 2.51  |
| TAG 56:4      | 14.98 | [M+NH <sub>4</sub> ] <sup>+</sup> | 928.8328         | 928.8322          | -0.65 |
| TAG 56:5      | 14.67 | [M+NH <sub>4</sub> ] <sup>+</sup> | 926.8171         | 926.8161          | -1.08 |
| Lipid species | RT    | Ion                               | Calc. <i>m/z</i> | Exptl. <i>m/z</i> | ppm   |

|           |       |                                   |           |           |       |
|-----------|-------|-----------------------------------|-----------|-----------|-------|
| TAG 56:6  | 14.41 | [M+NH <sub>4</sub> ] <sup>+</sup> | 924.8015  | 924.8007  | -0.87 |
| TAG 56:7  | 14.14 | [M+NH <sub>4</sub> ] <sup>+</sup> | 922.7858  | 922.7849  | -0.98 |
| TAG 56:8  | 13.89 | [M+NH <sub>4</sub> ] <sup>+</sup> | 920.7702  | 920.7695  | -0.76 |
| TAG 56:9  | 13.67 | [M+NH <sub>4</sub> ] <sup>+</sup> | 918.7545  | 918.7542  | -0.33 |
| TAG 58:10 | 13.81 | [M+NH <sub>4</sub> ] <sup>+</sup> | 944.7702  | 944.7708  | 0.64  |
| TAG 58:11 | 13.59 | [M+NH <sub>4</sub> ] <sup>+</sup> | 942.7545  | 942.7546  | 0.11  |
| TAG 58:12 | 13.42 | [M+NH <sub>4</sub> ] <sup>+</sup> | 940.7389  | 940.7426  | 3.93  |
| TAG 58:13 | 12.18 | [M+NH <sub>4</sub> ] <sup>+</sup> | 938.7232  | 938.7241  | 0.96  |
| TAG 58:6  | 14.81 | [M+NH <sub>4</sub> ] <sup>+</sup> | 952.8328  | 952.8323  | -0.52 |
| TAG 58:7  | 14.59 | [M+NH <sub>4</sub> ] <sup>+</sup> | 950.8171  | 950.8170  | -0.11 |
| TAG 58:8  | 14.38 | [M+NH <sub>4</sub> ] <sup>+</sup> | 948.8015  | 948.8018  | 0.32  |
| TAG 58:9  | 14.11 | [M+NH <sub>4</sub> ] <sup>+</sup> | 946.7858  | 946.7856  | -0.21 |
| TAG 60:10 | 14.19 | [M+NH <sub>4</sub> ] <sup>+</sup> | 972.8015  | 972.8018  | 0.31  |
| TAG 60:11 | 14.03 | [M+NH <sub>4</sub> ] <sup>+</sup> | 970.7858  | 970.7860  | 0.21  |
| TAG 60:12 | 13.76 | [M+NH <sub>4</sub> ] <sup>+</sup> | 968.7702  | 968.7706  | 0.41  |
| TAG 60:13 | 13.52 | [M+NH <sub>4</sub> ] <sup>+</sup> | 966.7545  | 966.7559  | 1.45  |
| TAG 62:12 | 14.14 | [M+NH <sub>4</sub> ] <sup>+</sup> | 996.8015  | 996.8019  | 0.40  |
| TAG 62:13 | 13.83 | [M+NH <sub>4</sub> ] <sup>+</sup> | 994.7858  | 994.7877  | 1.91  |
| TAG 62:14 | 13.67 | [M+NH <sub>4</sub> ] <sup>+</sup> | 992.7702  | 992.7711  | 0.91  |
| TAG 64:16 | 13.52 | [M+NH <sub>4</sub> ] <sup>+</sup> | 1016.7702 | 1016.7745 | 4.23  |

**Table S5.** Accumulation of TGOOH species induced by OA

| <b>Lipid species</b> | <b>RT</b> | <b>Ion</b>                        | <b>Calc. <i>m/z</i></b> | <b>Exptl. <i>m/z</i></b> | <b>Ppm</b> |
|----------------------|-----------|-----------------------------------|-------------------------|--------------------------|------------|
| TG-OOH 48:1          | 9.17      | [M+NH <sub>4</sub> ] <sup>+</sup> | 854.7443                | 854.7481                 | 4.45       |
| TG-OOH 52:2          | 12.59     | [M+NH <sub>4</sub> ] <sup>+</sup> | 908.7913                | 908.7930                 | 1.87       |
| TG-OOH 54:7          | 13.61     | [M+NH <sub>4</sub> ] <sup>+</sup> | 926.7443                | 926.7442                 | -0.11      |
| TG-OOH 56:10         | 10.13     | [M+NH <sub>4</sub> ] <sup>+</sup> | 948.7287                | 948.7265                 | -2.32      |
| TG-OOH 56:4          | 14.19     | [M+NH <sub>4</sub> ] <sup>+</sup> | 960.8226                | 960.8207                 | -1.98      |
| TG-OOH 56:5          | 13.81     | [M+NH <sub>4</sub> ] <sup>+</sup> | 958.8069                | 958.8085                 | 1.67       |
| TG-OOH 58:10         | 10.79     | [M+NH <sub>4</sub> ] <sup>+</sup> | 976.7600                | 976.7574                 | -2.66      |
| TG-OOH 58:11         | 10.15     | [M+NH <sub>4</sub> ] <sup>+</sup> | 974.7443                | 974.7418                 | -2.56      |
| TG-OOH 58:6          | 13.98     | [M+NH <sub>4</sub> ] <sup>+</sup> | 984.8226                | 984.8235                 | 0.91       |
| TG-OOH 58:7          | 13.7      | [M+NH <sub>4</sub> ] <sup>+</sup> | 982.8069                | 982.8095                 | 2.65       |
| TG-OOH 58:8          | 13.44     | [M+NH <sub>4</sub> ] <sup>+</sup> | 980.7913                | 980.7941                 | 2.85       |
| TG-OOH 60:11         | 13.79     | [M+NH <sub>4</sub> ] <sup>+</sup> | 1002.7756               | 1002.7768                | 1.20       |
| TG-OOH 60:13         | 10.79     | [M+NH <sub>4</sub> ] <sup>+</sup> | 998.7443                | 998.7402                 | -4.11      |
| TG-OOH 60:14         | 10.75     | [M+NH <sub>4</sub> ] <sup>+</sup> | 996.7287                | 996.7336                 | 4.92       |
| TG-OOH 60:15         | 10.15     | [M+NH <sub>4</sub> ] <sup>+</sup> | 994.7130                | 994.7174                 | 4.42       |

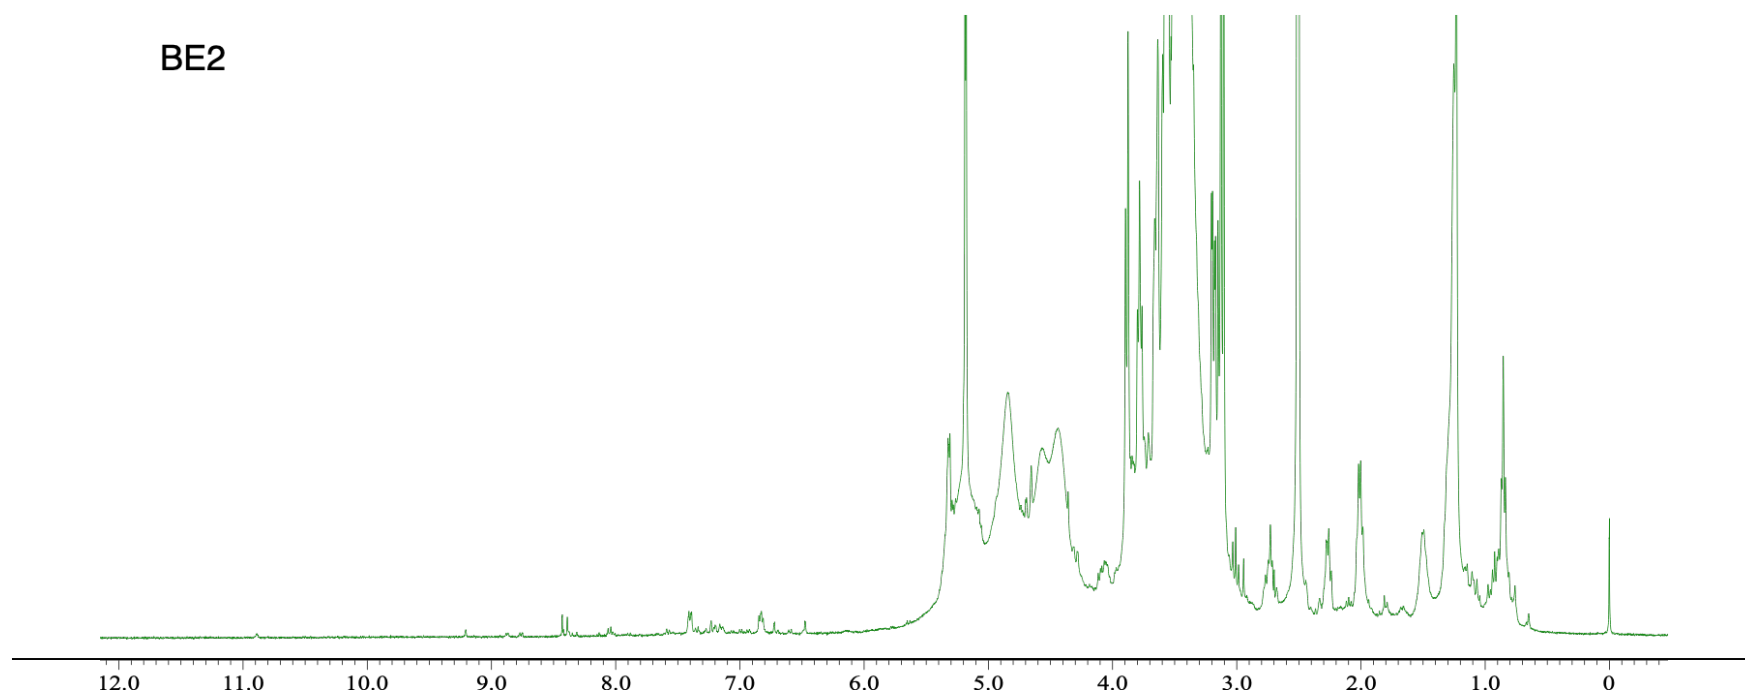

**Figure S2.**  $^1\text{H}$  NMR spectrum of BE2 in DMSO- $d_6$

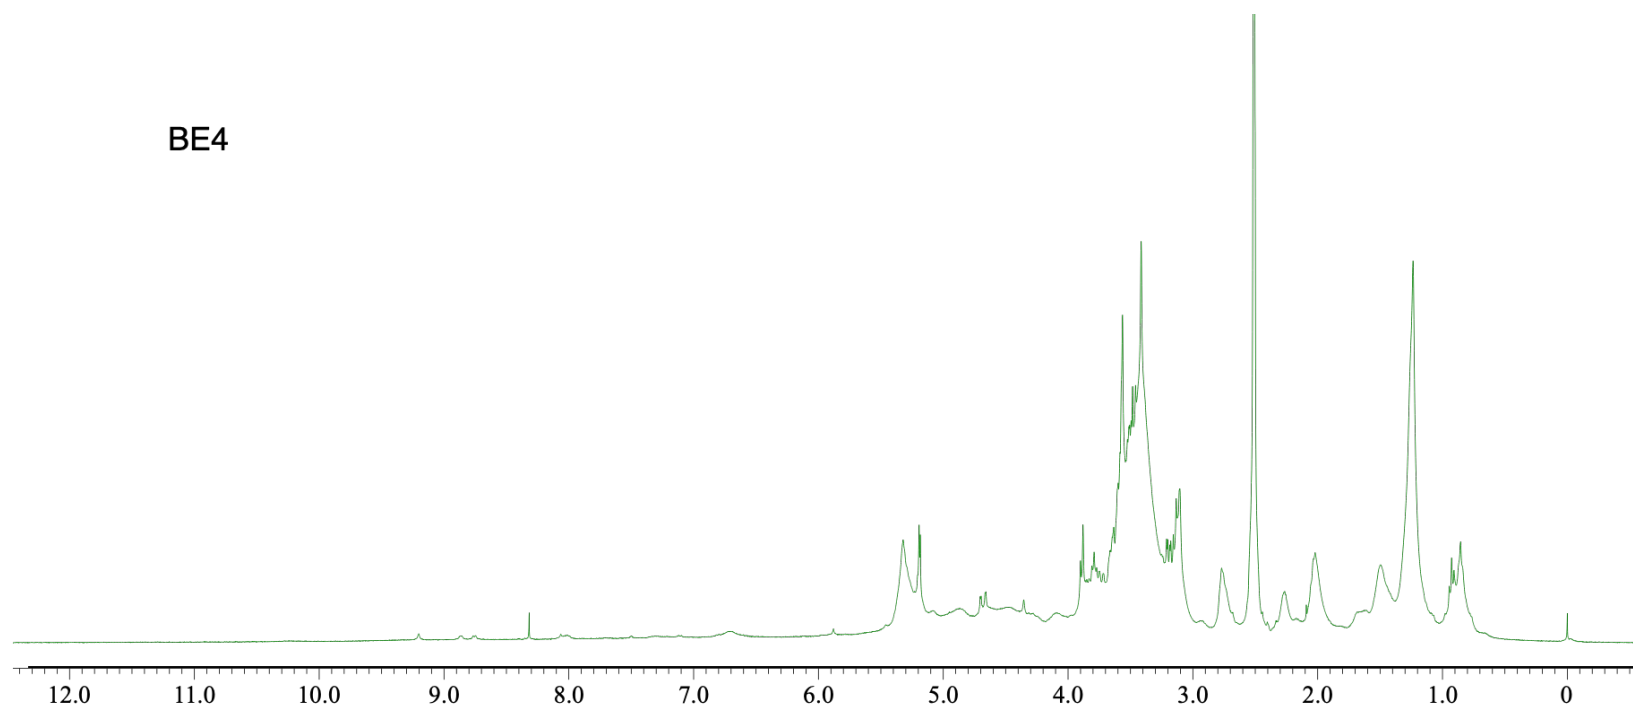

**Figure S3.**  $^1\text{H}$  NMR spectrum of BE4 in DMSO- $d_6$



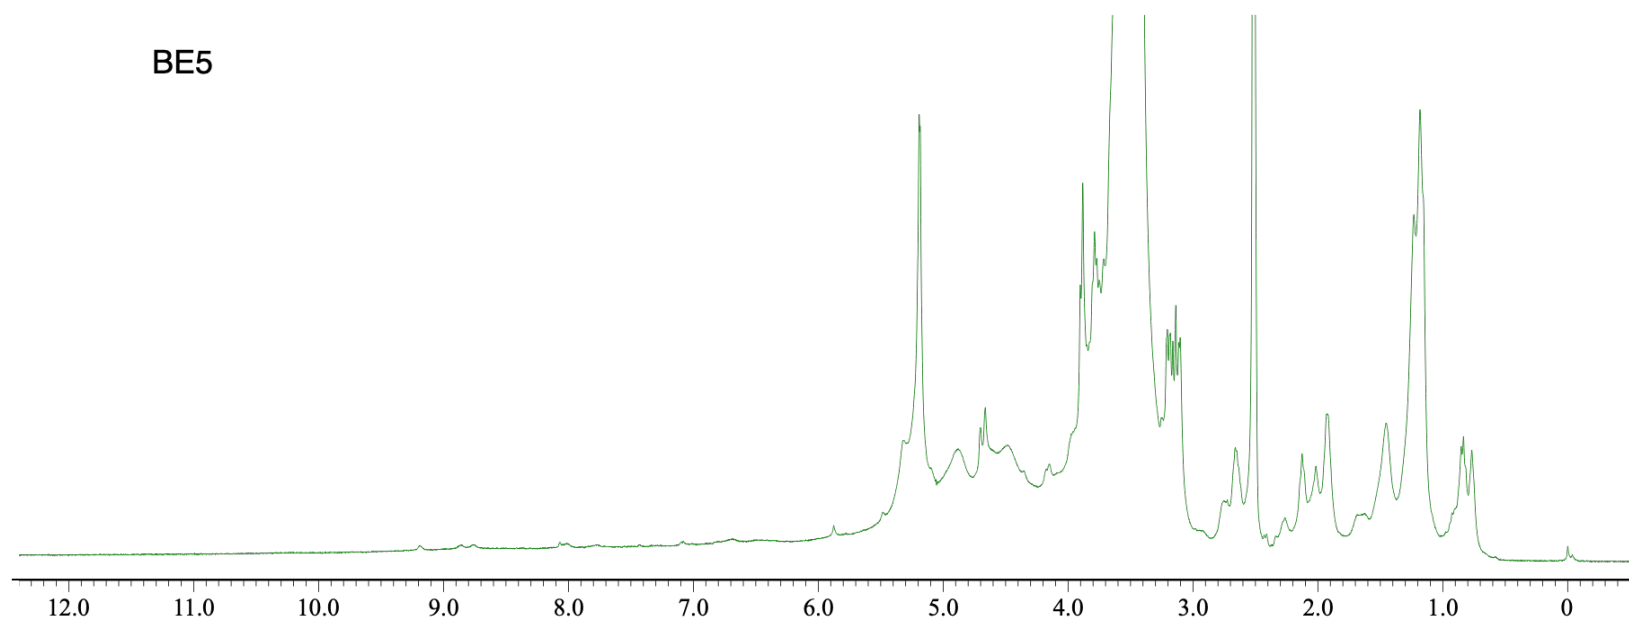

**Figure S4.**  $^1\text{H}$  NMR spectrum of BE5 in  $\text{DMSO-d}_6$

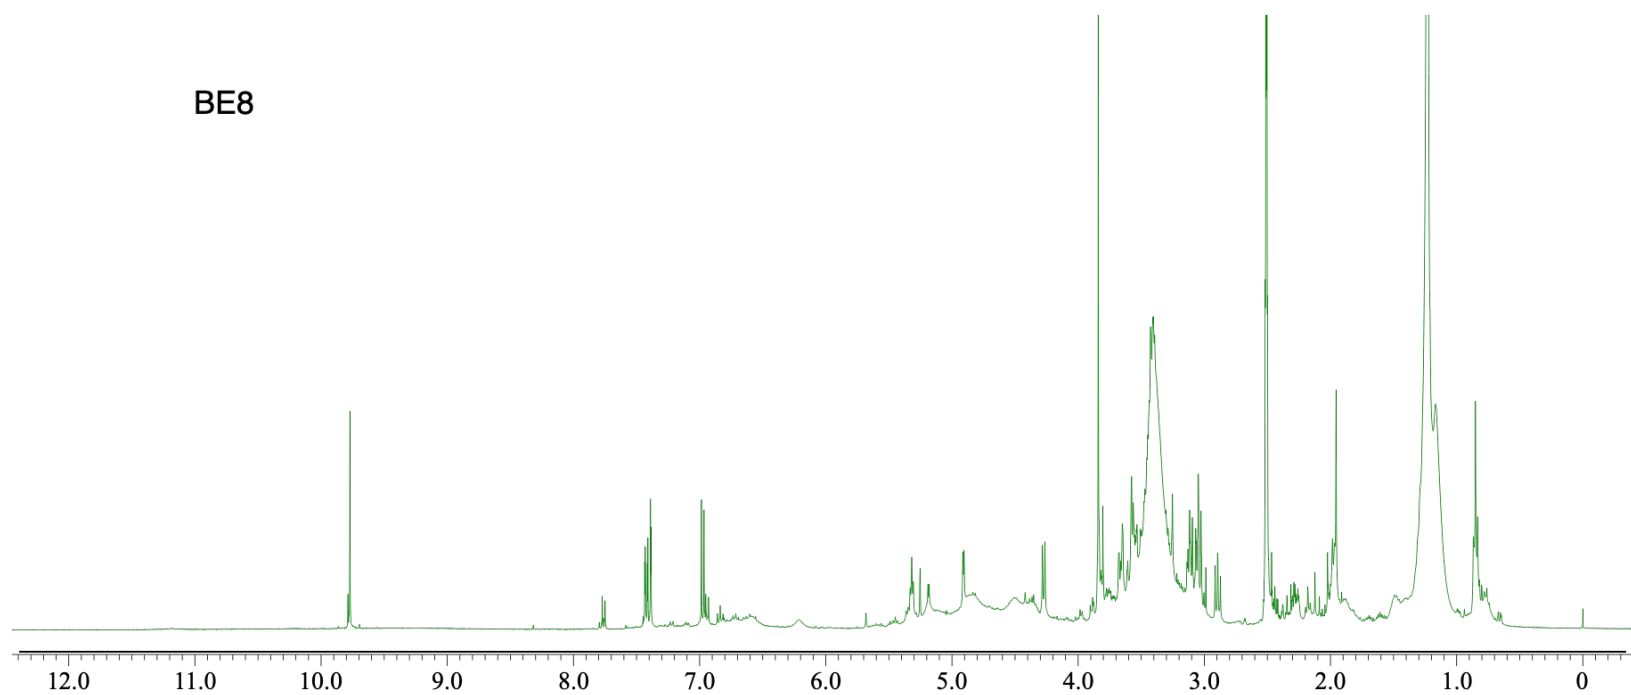

**Figure S5.**  $^1\text{H}$  NMR spectrum of BE8 in  $\text{DMSO-d}_6$

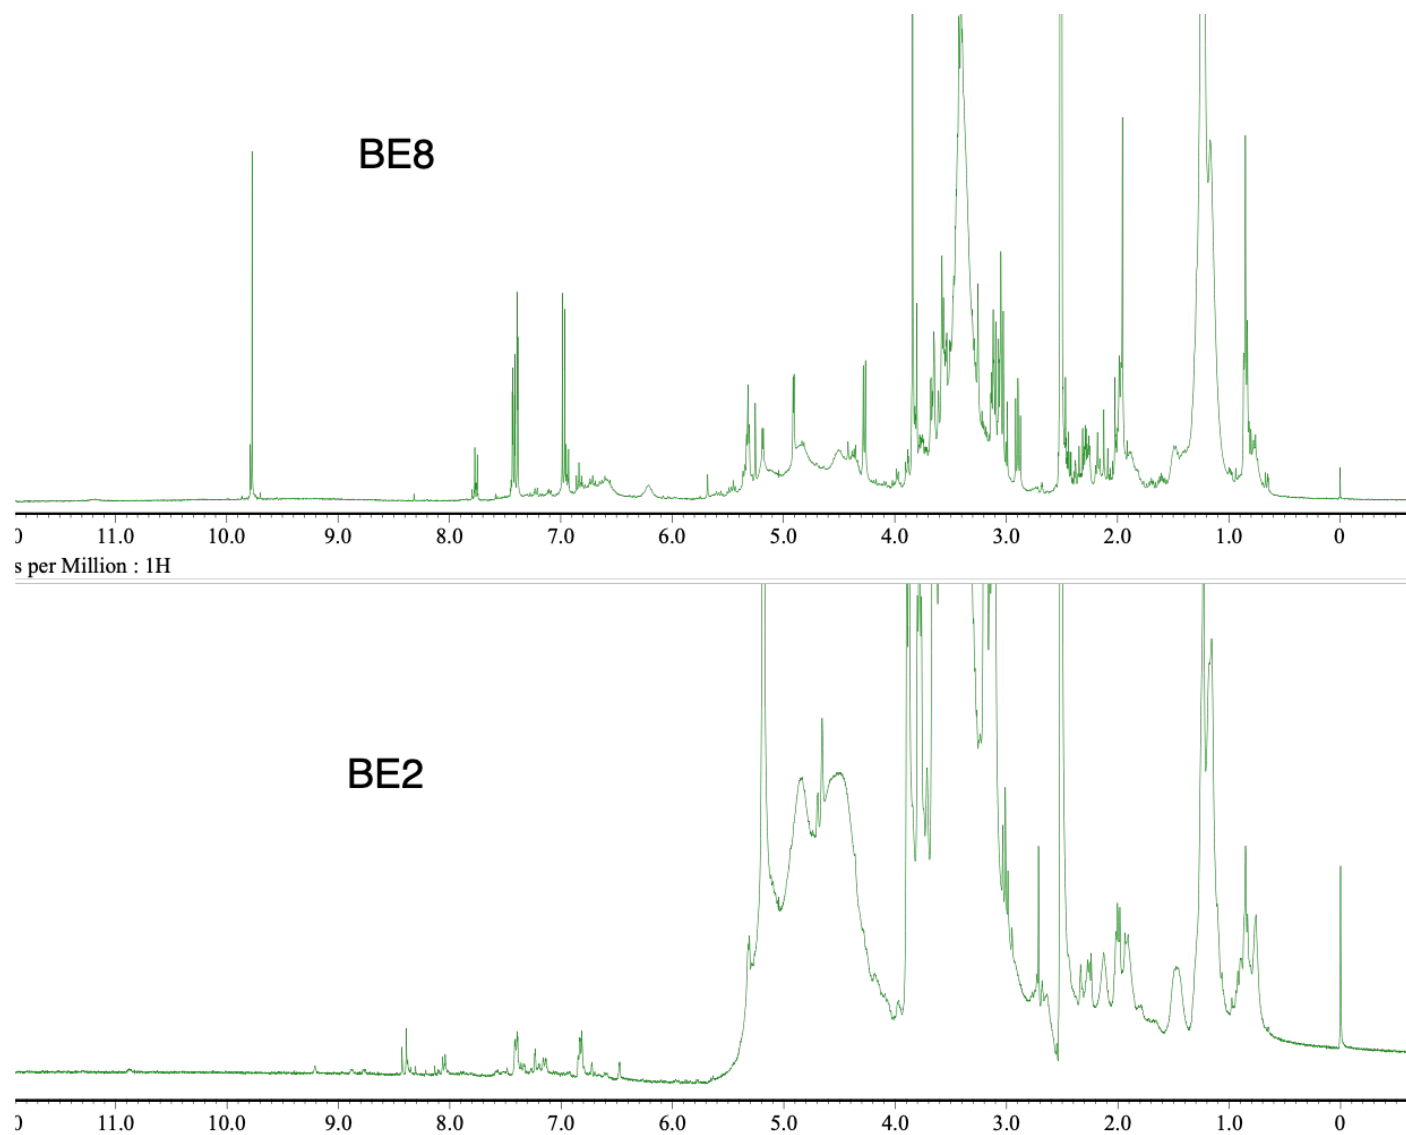

**Figure S6.**  $^1\text{H}$  NMR spectrum of bioactive extract BEs (BE2 and BE8) in DMSO- $d_6$

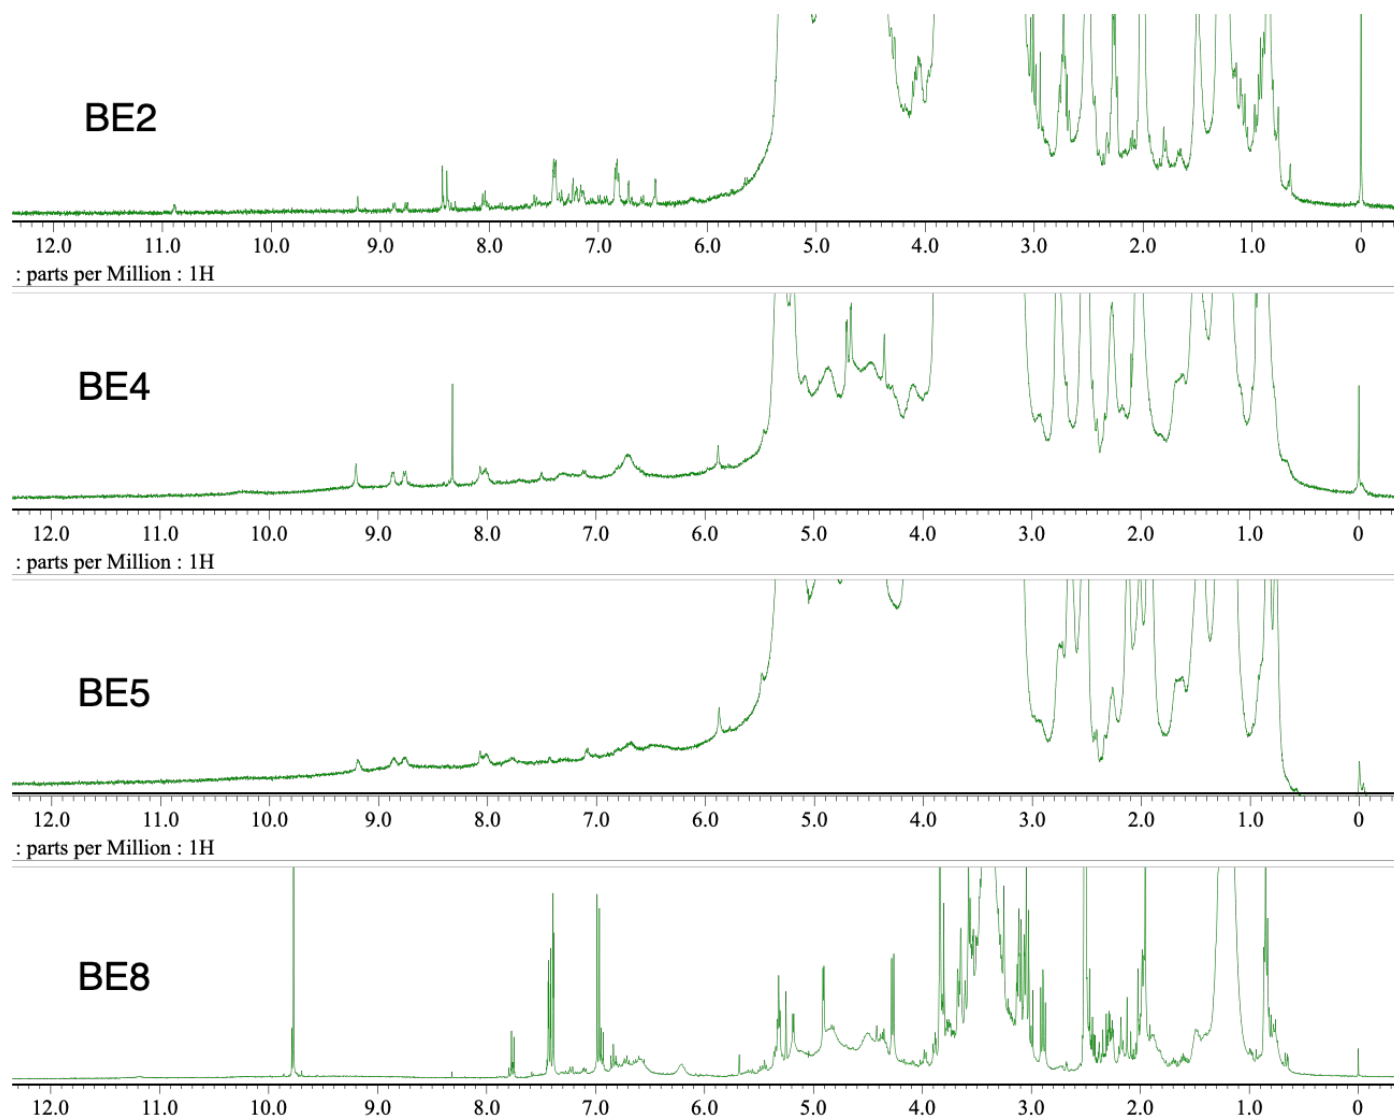

**Figure S7.**  $^1\text{H}$  NMR spectrum of bioactive extract BEs (BE2 and BE8) in DMSO- $d_6$

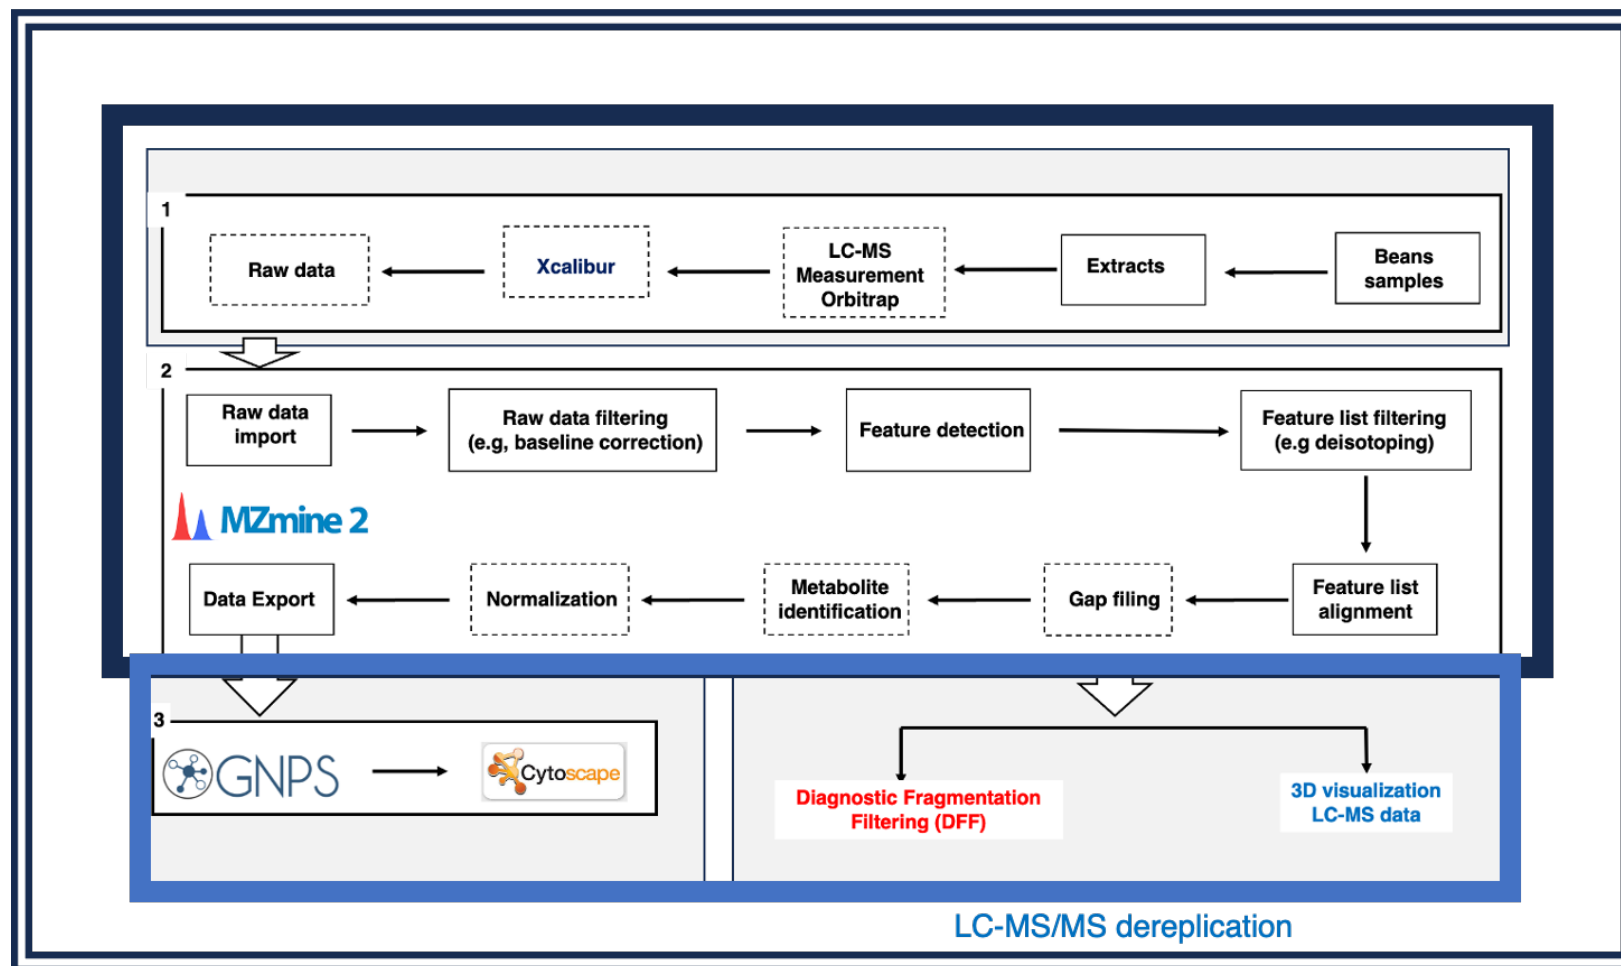

**Figure S8.** A schema of the general data processing workflow of LC-MS data

A

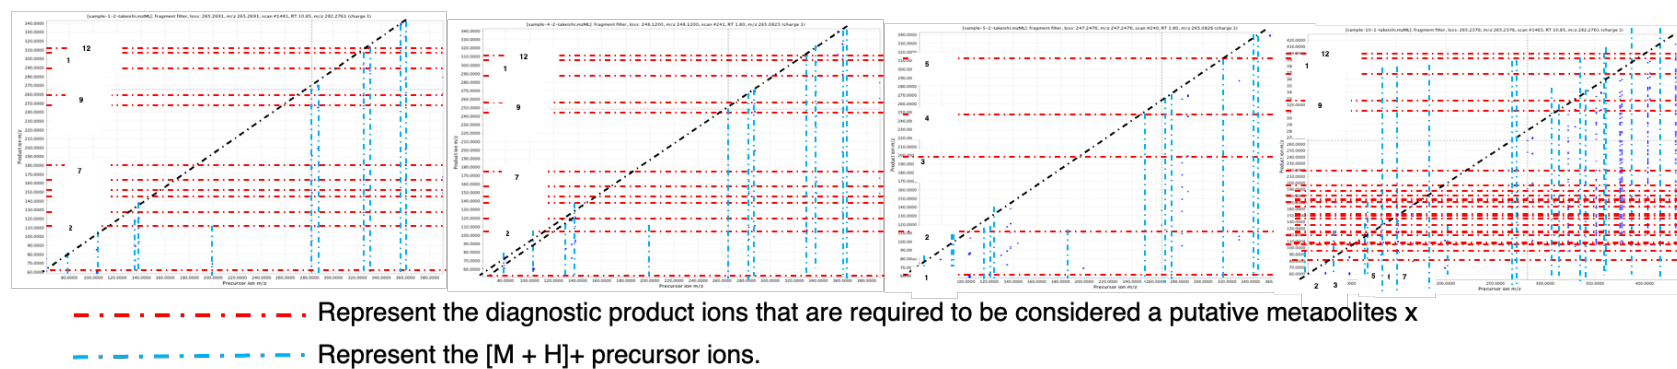

B

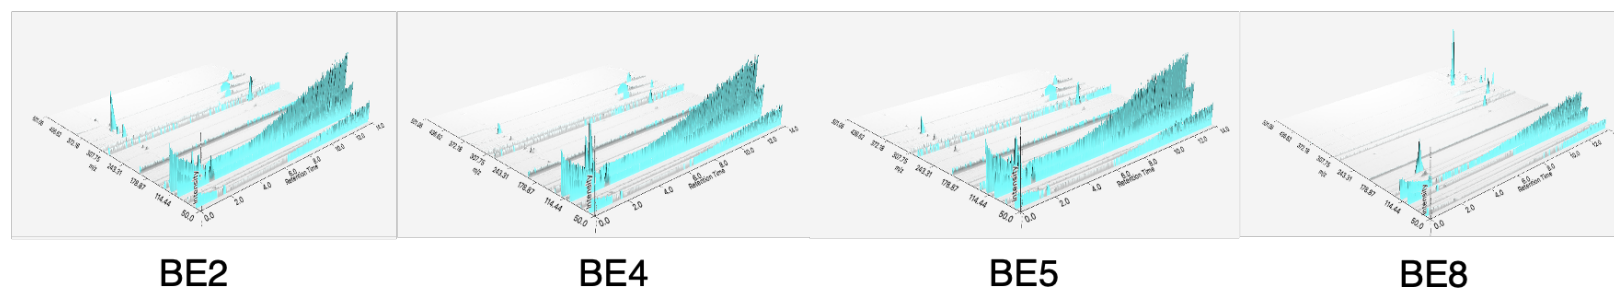

**Figure S9.** LC-MS profiling of bioactive bean extracts. (A) Diagnostic Fragmentation Filtering (DFF) plot for metabolites analysis. (B) 3D visualization of MS data.

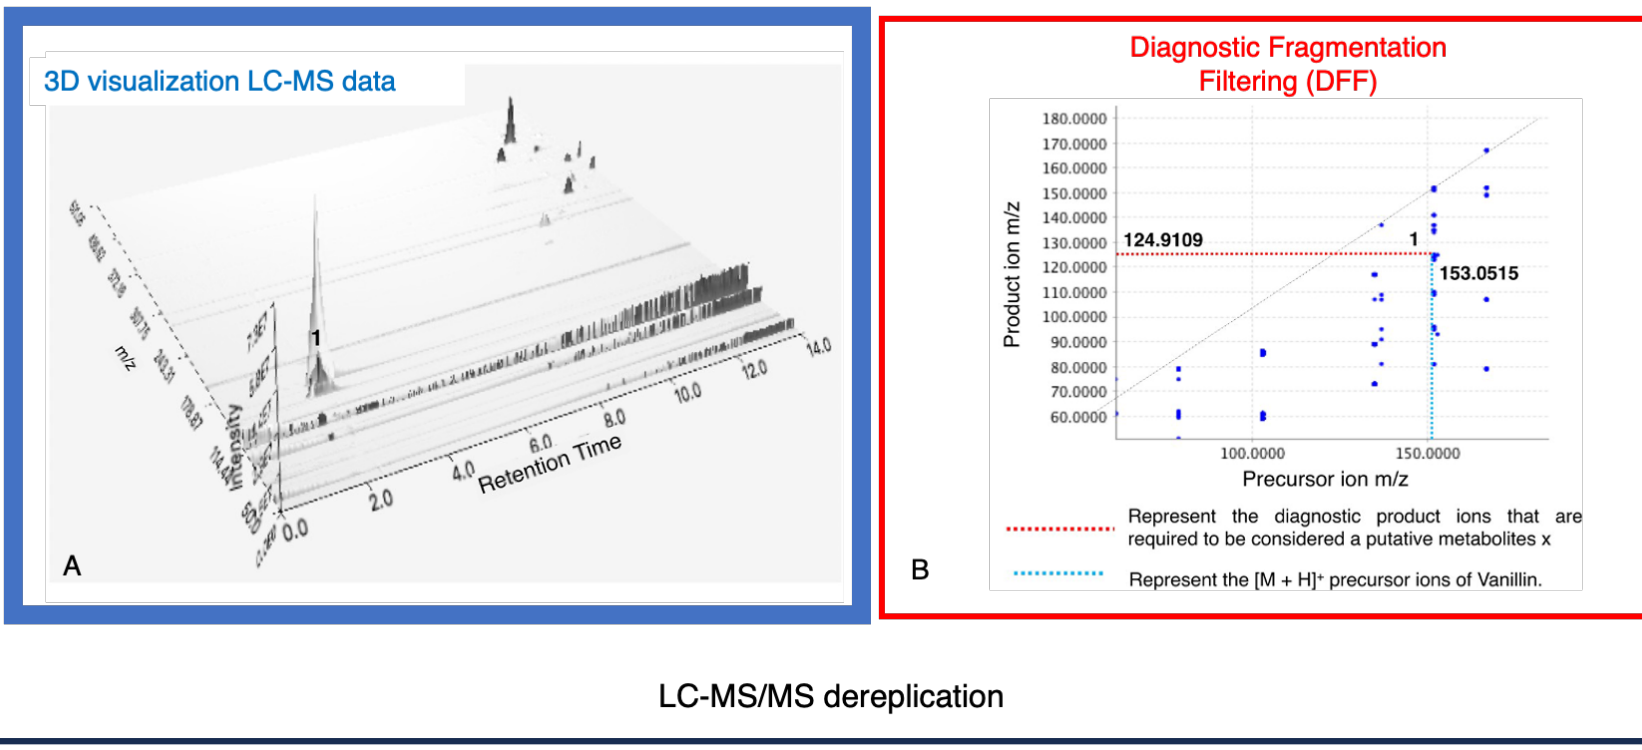

**Figure S10.** Identification of vanillin in BE8. (A) Three-dimensional (3D) liquid chromatography/mass spectrometry (LC-MS) of BE8 and vanillin. (B) Plot of the vanillin in BE8 using diagnostic fragmentation filtering (DFF).

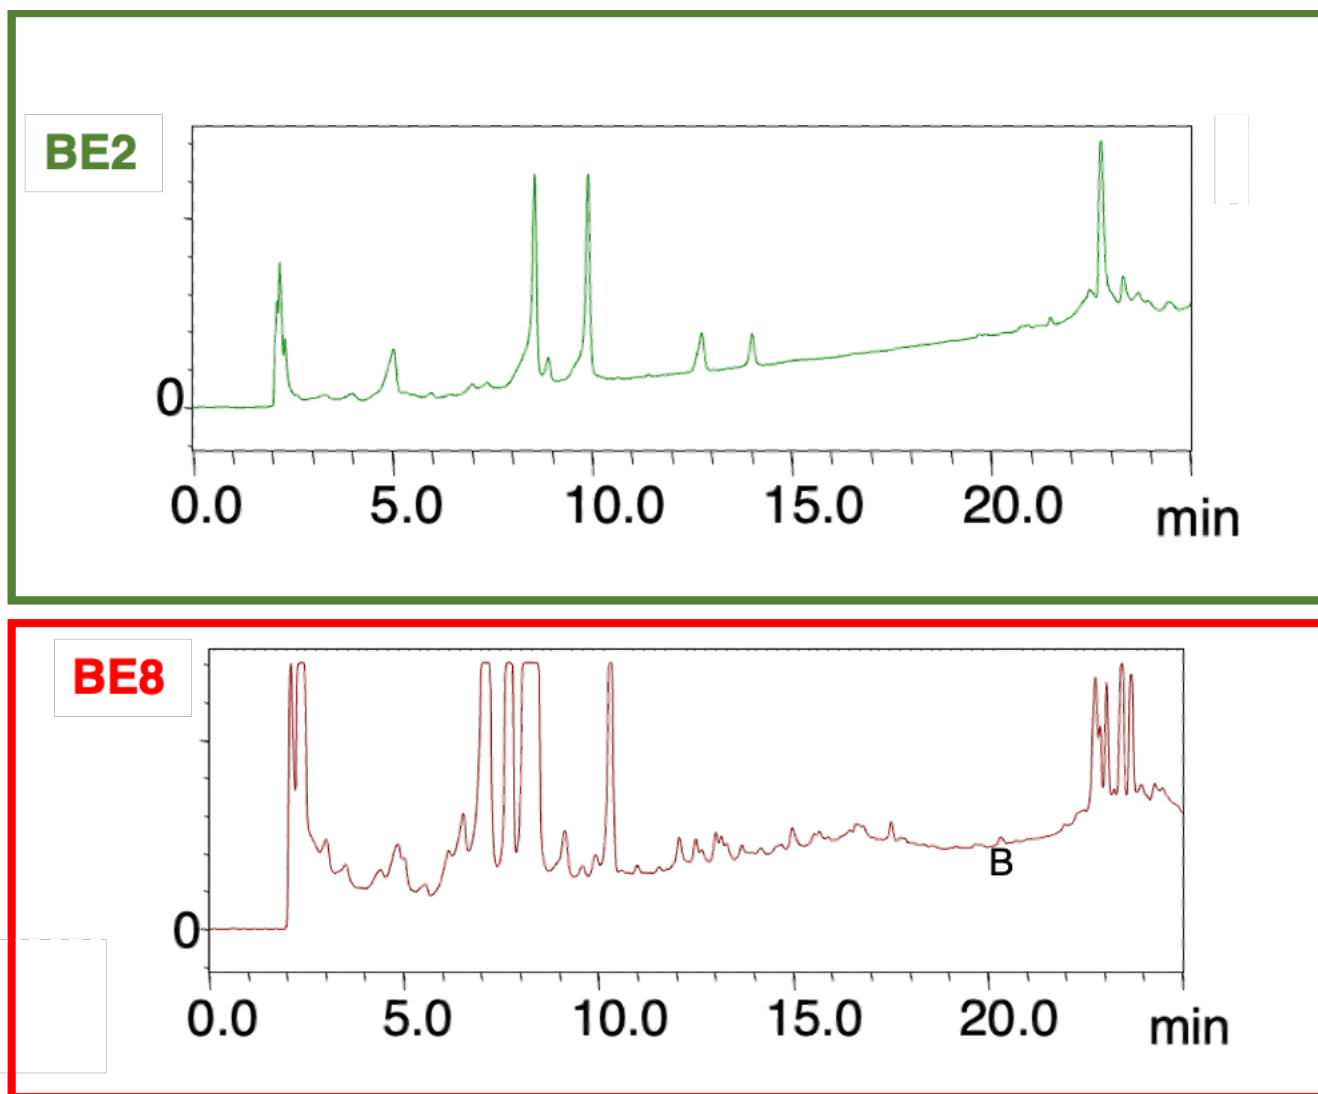

**Figure S11.** HPLC profile of bioactive bean BE2 and BE8 at 200nm



## Supporting LDAI Imaging

|                                                                                                                                                                                                                                                      |     |
|------------------------------------------------------------------------------------------------------------------------------------------------------------------------------------------------------------------------------------------------------|-----|
| <b>Table of contents</b>                                                                                                                                                                                                                             | P25 |
| 1. <b>Scheme S1.</b> A. Capture of the LDA real time images on HepG2 cells with the interval of 6h. B. Vial ability staining with AO and EB. C. Evaluation of LDA and oxLDs inhibition strategy                                                      | P26 |
| 2. <b>Scheme S2.</b> A. Comparison of the capture of the LDA under -OA and +OA in real time images on HepG2 cells with the interval of 12h. B. LDAI activity of BE1-BE8. C. Comparison of the vial ability staining with AO and EB under -OA and +OA | P27 |

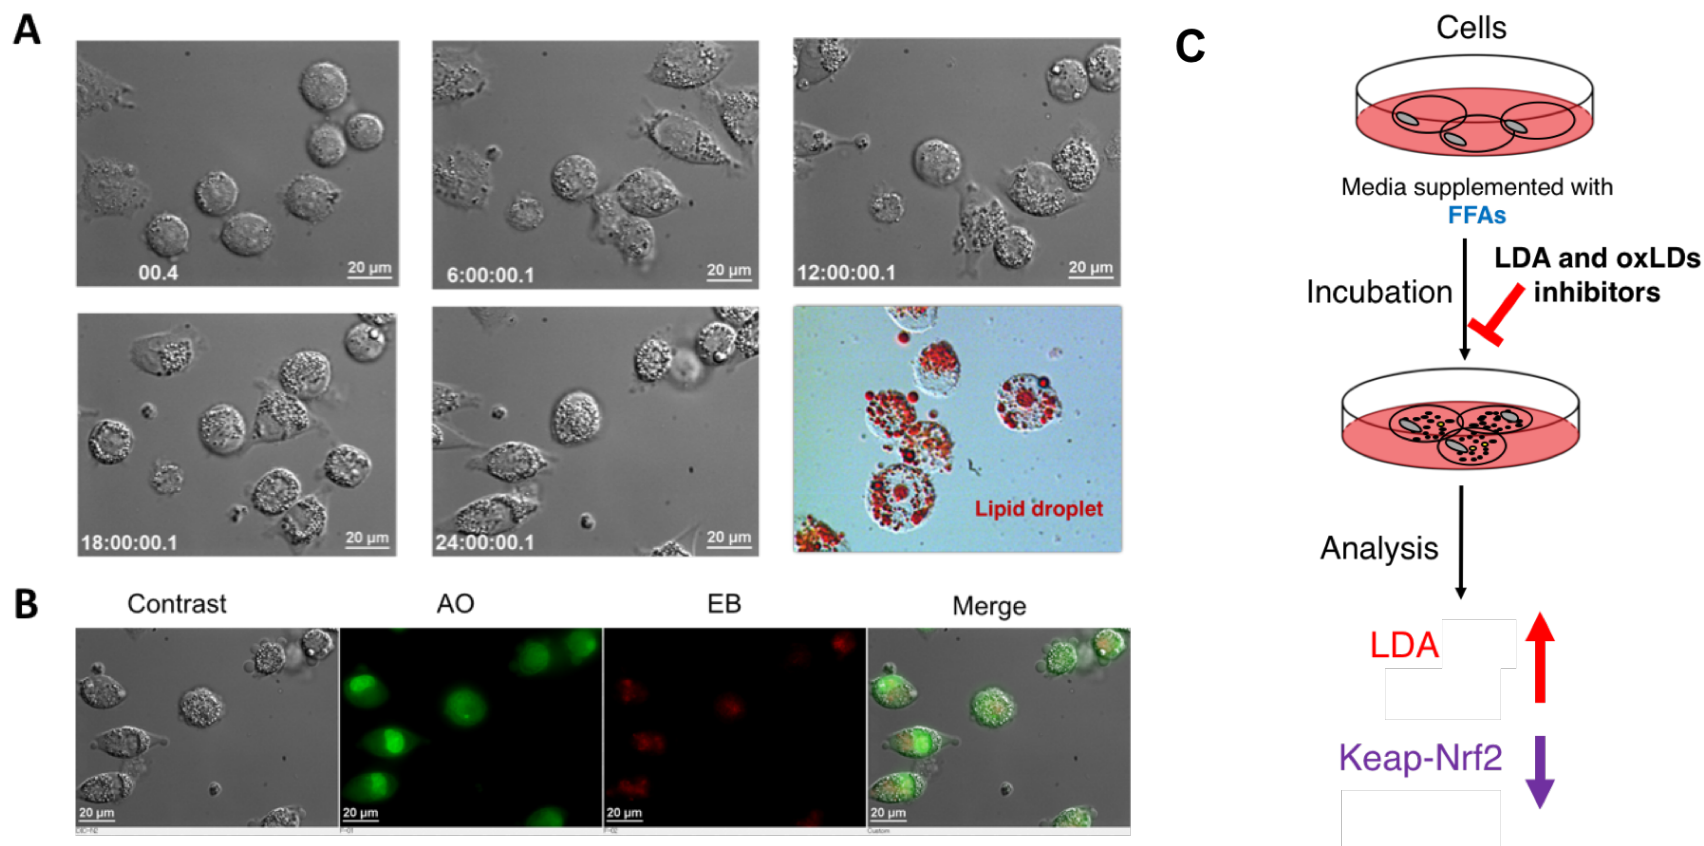

**Scheme S1.** A. Capture of the LDA real time images on HepG2 cells with the interval of 6h. B Viability staining with AO and EB. C. Evaluation of LDA and oxLDs inhibition strategy
